# Supplementary material
Source: publisher figshare collection journal article supplement (https://acs.figshare.com/ndownloader/files/4206868)

# Simultaneous Chemical Modification and Structural Transformation of Stöber Silica Spheres for Integration of Nanocatalysts

Ke Xin Yao<sup>1</sup> and Hua Chun Zeng<sup>\*,1,2</sup>

<sup>1</sup> Department of Chemical and Biomolecular Engineering and KAUST-NUS GCR Program, Faculty of Engineering, National University of Singapore, 10 Kent Ridge Crescent, Singapore 119260

<sup>2</sup> Institute of Materials Research and Engineering (IMRE), 3 Research Link, Singapore 117602

\*Email: chezhc@nus.edu.sg

## SI-1 The roles of PDDA polyelectrolyte

PDDA-modified SiO<sub>2</sub> spheres were entirely dissolved in NaOH

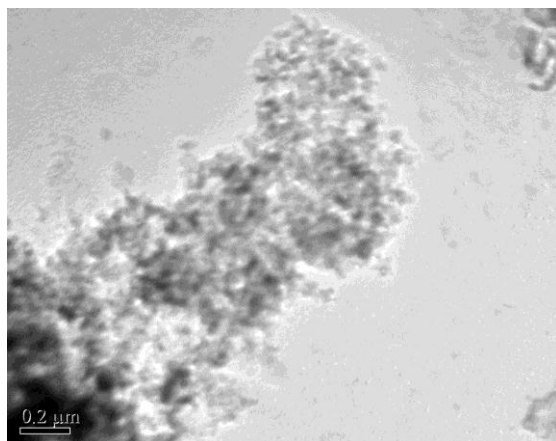

### Experimental condition:

0.10 g of SiO<sub>2</sub> spheres was dispersed in 10 mL of 1% PDDA (poly(diallyldimethylammonium chloride)) solution by ultrasonication and stirred for 30 min for surface modification. The surface-modified SiO<sub>2</sub> spheres and 0.02 g of Zn<sub>4</sub>CO<sub>3</sub>(OH)<sub>6</sub>·H<sub>2</sub>O were dispersed in 20.0 mL of 0.01 M NaOH solution again by ultrasonication. Afterwards, the hydrothermal treatment was carried out at 180°C for 4 h.

**Note:** This experiment shows that PDDA was not a protecting agent in our synthesis and the silica spheres (see Figure 2a,b in the main text) were entirely broken down in NaOH.

## SI-2 XFS compositional analysis of porous Zn-SiO<sub>2</sub> spheres (atomic ratio)

| Spectrum Label | Calc | Pos.X | Pos.Y | Pos.Z | Zn:Si Ratio |
|----------------|------|-------|-------|-------|-------------|
| Spectrum 3     | YES  | 40001 | 19120 | 0     | 0.028241    |
| Spectrum 4     | YES  | 40723 | 19120 | 0     | 0.028737    |
| Spectrum 5     | YES  | 41399 | 18476 | 0     | 0.025281    |
| Spectrum 6     | YES  | 39693 | 18240 | 0     | 0.022831    |
| Spectrum 7     | YES  | 40569 | 18920 | 0     | 0.02973     |
| Spectrum 9     | YES  | 39777 | 19534 | 0     | 0.030626    |
| Average        |      |       |       |       | 0.027574    |

## SI-3 Growth investigations of hollowing process

### (a) Insufficient surface modification of PDPA on SiO<sub>2</sub> spheres

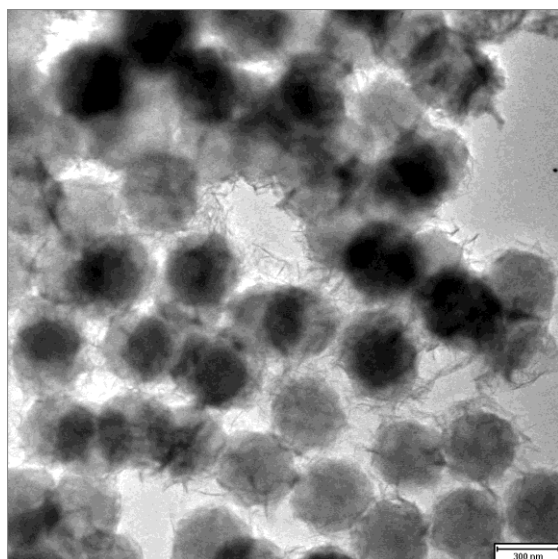

#### Experimental condition:

0.05 g of SiO<sub>2</sub> spheres was dispersed in 10 mL of 1% PDPA (poly(diallyldimethylammonium chloride)) solution by ultrasonication and stirred for 30 min for PDPA adsorption. The PDPA-adsorbed SiO<sub>2</sub> spheres and 0.03 g of Zn<sub>4</sub>CO<sub>3</sub>(OH)<sub>6</sub>·H<sub>2</sub>O were dispersed in 20.0 mL of de-ionized water by ultrasonication. Afterwards, the hydrothermal treatment was carried out at 180°C for 6 h.

**Note:** This experiment shows that an insufficient amount of PDPA on the SiO<sub>2</sub> surface cannot attract sufficient hydroxyl ions and serve as template for shell formation. In such a case, the Zn-SiO<sub>2</sub> thin flakes could not form complete shells.

**(b) Attraction between hydroxyl ions and PDDA in bulk solution**

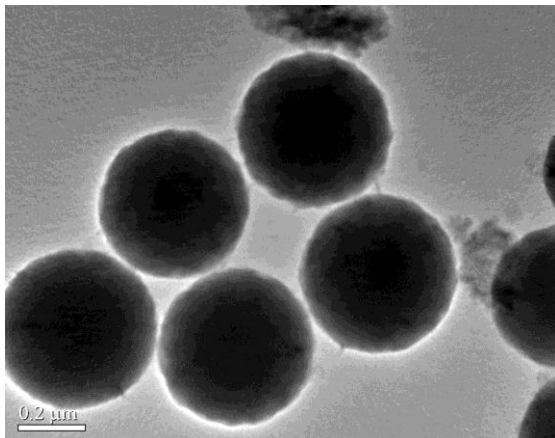

**Experimental condition:**

0.10 g of SiO<sub>2</sub> spheres (510 nm) was dispersed in 10 mL of 2% PDDA (poly(diallyldimethylammonium chloride)) solution by ultrasonication and stirred for 30 min for PDDA adsorption. The PDDA-coated SiO<sub>2</sub> spheres and 0.025 g of Zn<sub>4</sub>CO<sub>3</sub>(OH)<sub>6</sub>·H<sub>2</sub>O were dispersed in 20.0 mL of 1% PDDA solution (instead of 20.0 mL of de-ionized water) by ultrasonication. Afterwards, the hydrothermal treatment was carried out at 180°C for 4 h.

**Note:** This experiment shows that hydroxyl ions were not attracted to the PDDA-adsorbed SiO<sub>2</sub> spheres. Instead, they were attracted to the positive PDDA present in the bulk solution phase.

**(c) Experimental conditions for Figures 5 and 6 (main text):**

**Figure 5(a):** 0.10 g of SiO<sub>2</sub> spheres (510 nm) was dispersed in 10 mL of 2% PDDA (poly(diallyldimethylammonium chloride)) solution by ultrasonication and stirred for 30 min for PDDA adsorption. The PDDA-adsorbed SiO<sub>2</sub> spheres and 0.03 g of Zn<sub>4</sub>CO<sub>3</sub>(OH)<sub>6</sub>·H<sub>2</sub>O were dispersed in 20.0 mL of de-ionized water by ultrasonication. Afterwards, the hydrothermal treatment was carried out at 180°C for 4 h.

**Note:** This experiment shows that Zn-SiO<sub>2</sub> core-shell spheres are highly monodisperse and they can be arranged into a two-dimensional hexagonal superlattice.

**Figure 5(b):** 0.10 g of SiO<sub>2</sub> spheres (510 nm) was dispersed in 10 mL of 2% PDDA (poly(diallyldimethylammonium chloride)) solution by ultrasonication and stirred for 30 min for PDDA adsorption. The PDDA-adsorbed SiO<sub>2</sub> spheres and 0.03 g of Zn<sub>4</sub>CO<sub>3</sub>(OH)<sub>6</sub>·H<sub>2</sub>O were dispersed in 20.0 mL of de-ionized water by ultrasonication. Afterwards, the hydrothermal treatment was carried out at 180°C for 4 h.

**Note:** This experiment shows that Zn-SiO<sub>2</sub> core-shell spheres are highly monodisperse and they can be arranged into a two-dimensional hexagonal superlattice.

**Figure 6(a):** 0.05 g of SiO<sub>2</sub> spheres (260 nm) was dispersed in 10 mL of 2% PDDA (poly(diallyldimethylammonium chloride)) solution by ultrasonication and stirred for 30 min for PDDA adsorption. The PDDA-adsorbed SiO<sub>2</sub> spheres and 0.04 g of Zn<sub>4</sub>CO<sub>3</sub>(OH)<sub>6</sub>·H<sub>2</sub>O were dispersed in 20.0 mL of de-ionized water by ultrasonication. Afterwards, the hydrothermal treatment was carried out at 180°C for 4 h.

**Note:** This experiment shows that small hollow spheres (diameter = 150 nm) of Zn-SiO<sub>2</sub> can also be attained with this approach.

**Figure 6(b):** 0.05 g of SiO<sub>2</sub> spheres (330 nm) was dispersed in 10 mL of 2% PDDA (poly(diallyldimethylammonium chloride)) solution by ultrasonication and stirred for 30 min for PDDA adsorption. The PDDA-adsorbed SiO<sub>2</sub> spheres and 0.03 g of Zn<sub>4</sub>CO<sub>3</sub>(OH)<sub>6</sub>·H<sub>2</sub>O were dispersed in 20.0 mL of de-ionized water by ultrasonication. Afterwards, the hydrothermal treatment was carried out at 180°C for 4 h.

**Note:** This experiment shows that small hollow spheres (diameter = 250 nm) of Zn-SiO<sub>2</sub> can also be attained with this approach.

#### SI-4 BET/BJH analytical results of porous Zn-doped SiO<sub>2</sub> (Zn-SiO<sub>2</sub>) spheres

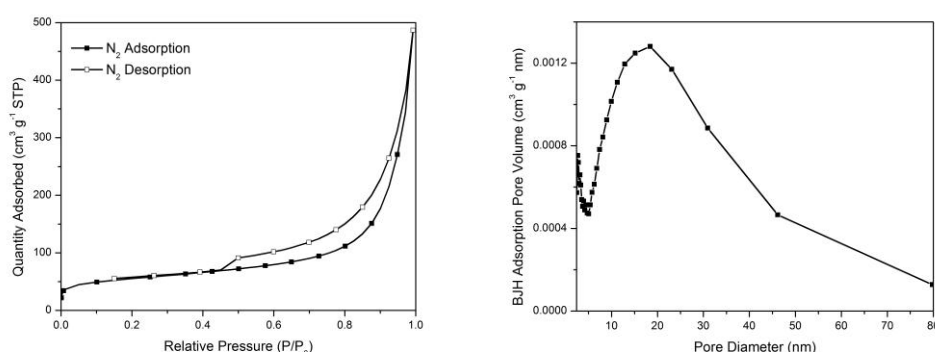

(a) Nitrogen adsorption-desorption isotherms (for BET analysis), and (b) pore volume curve and pore size distribution profile calculated from desorption isotherm (with BJH method).

#### SI-5 Arene hydrogenation reactions

Sample data of GC-MS analysis in toluene hydrogenation reaction

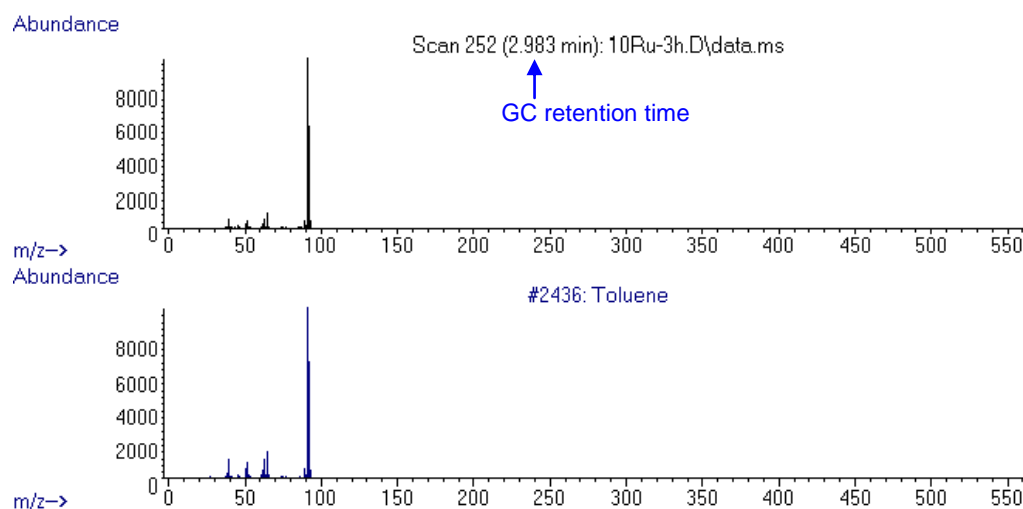

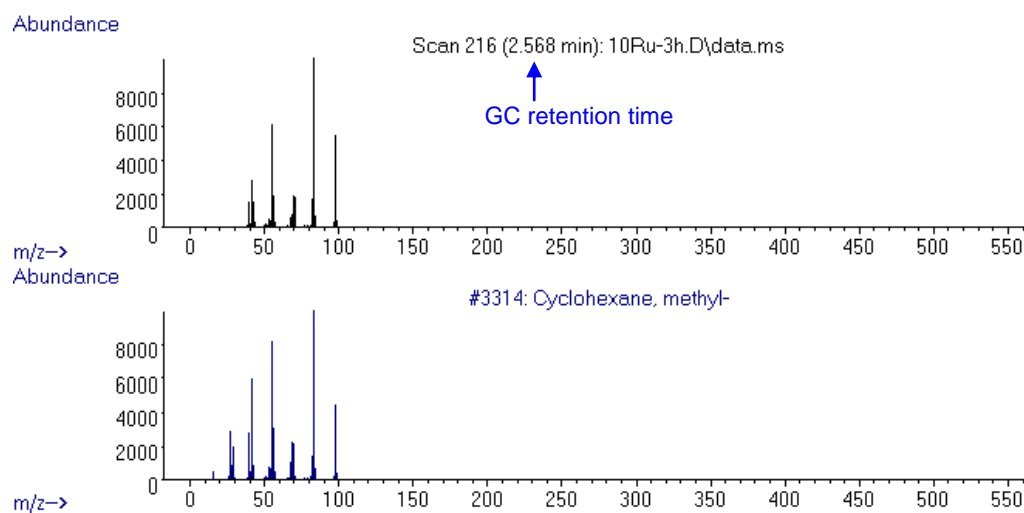

**Note:** Toluene was converted entirely to methyl-cyclohexane in this reaction (i.e., 100% selectivity)

#### SI-6 Morphology of used catalysts of Ru/ZnO/Zn-SiO<sub>2</sub>

Low resolution TEM image; sample from Entry 6 of Table 1 in the main text (after the 5<sup>th</sup> run of toluene hydrogenation reaction)

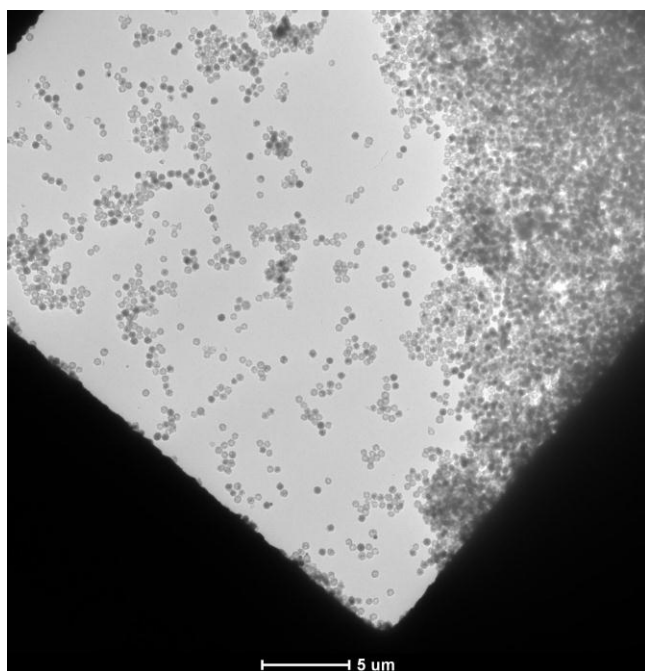

Supplement: Supplementary file 1 [file 4206868]
